# Supplementary material
Source: ML conference proceedings conference paper supplement (https://openaccess.thecvf.com/content/CVPR2023/html/Deitke_Phone2Proc_Bringing_Robust_CVPR_2023_paper.html)
Supplement: Supplementary file 3 [file Deitke_Phone2Proc_Bringing_Robust_CVPR_2023_supplemental.zip]

Archive with 13 entries (11 files):
- phone2proc_camera_ready_supplementary/
- phone2proc_camera_ready_supplementary/supp.pdf
- __MACOSX/phone2proc_camera_ready_supplementary/._supp.pdf
- phone2proc_camera_ready_supplementary/.DS_Store
- __MACOSX/phone2proc_camera_ready_supplementary/._.DS_Store
- phone2proc_camera_ready_supplementary/scene_videos/
- phone2proc_camera_ready_supplementary/cvpr2023_supp_trajectories.mp4
- __MACOSX/phone2proc_camera_ready_supplementary/._cvpr2023_supp_trajectories.mp4
- phone2proc_camera_ready_supplementary/scene_videos/3_room_apartment.mp4
- phone2proc_camera_ready_supplementary/scene_videos/6_room_apartment.mp4
- phone2proc_camera_ready_supplementary/scene_videos/cafeteria.mp4
- phone2proc_camera_ready_supplementary/scene_videos/robothor_real.mp4
- phone2proc_camera_ready_supplementary/scene_videos/conference_room.mp4
